# Supplementary material for: Effectiveness of combined chloroquine and primaquine treatment in 14 days versus intermittent single dose regimen, in an open, non-randomized, clinical trial, to eliminate Plasmodium vivax in southern Mexico
Source: PubMed Central journal article supplement (PMC4628368; doi:10.1186/s12936-015-0938-2), 2015-10-30
Supplement: 12936_2015_938_MOESM1_ESM.pdf [file 12936_2015_938_MOESM1_ESM.pdf]

**Additional file 1 *Plasmodium vivax* treatment regimens based on chloroquine and primaquine, by age groups as indicated in the Mexican guidelines for malaria treatment**

**Table 8. Treatment with intermittent single combined doses; ISD**

| Age group:                                           | No. of tablets of chloroquine, 150 mg | No. of tablets of primaquine, 5mg | No. of tablets of primaquine, 15mg |
|------------------------------------------------------|---------------------------------------|-----------------------------------|------------------------------------|
| 1 year old                                           | 1/2                                   | 1                                 | 0                                  |
| 2 a 5 years old                                      | 1                                     | 2                                 | 0                                  |
| 6 a 12 years old                                     | 2                                     | 4                                 | 0                                  |
| 13 years old and over:<br>about 60 kg of body weight | 3                                     | 0                                 | 2                                  |
| above 60 kg of body weight                           | 4                                     | 0                                 | 3                                  |

**Table 10. Treatment for radical cure of 14 days; T14**

| Age group:                                           | *No. of tablets of chloroquine, 150 mg |                  | No. of tablets of primaquine, daily during 14 days |       |
|------------------------------------------------------|----------------------------------------|------------------|----------------------------------------------------|-------|
|                                                      | First day                              | 2nd and 3th Days | 5 mg                                               | 15 mg |
| 1 year old                                           | 1                                      | 1/2              | 1/2                                                | 0     |
| 2 a 5 years old                                      | 1,1/4                                  | 1                | 1                                                  | 0     |
| 6 a 12 years old                                     | 2                                      | 1,1/2            | 2                                                  | 0     |
| 13 years old and over:<br>about 60 kg of body weight | 3                                      | 2, 1/4           | 0                                                  | 1     |
| above 60 kg of body weight                           | 4                                      | 3                | 0                                                  | 1     |

\*adjusted to administer for three days

NOM-032-SSA2-2002, Available at:

<http://www.salud.gob.mx/unidades/cdi/nom/032ssa202.html>.
