# Supplementary material for: Effectiveness of combined chloroquine and primaquine treatment in 14 days versus intermittent single dose regimen, in an open, non-randomized, clinical trial, to eliminate Plasmodium vivax in southern Mexico
Source: PubMed Central journal article supplement (PMC4628368; doi:10.1186/s12936-015-0938-2), 2015-10-30
Supplement: 12936_2015_938_MOESM2_ESM.pdf [file 12936_2015_938_MOESM2_ESM.pdf]

## Additional file 2 Chloroquine and primaquine drug batches used during the study

| Laboratory                   | Code | Drugs                    | Batch      | Expiration date   | mg per tablet | Period of distribution |
|------------------------------|------|--------------------------|------------|-------------------|---------------|------------------------|
| Proteín S.A<br>C.V           | 2030 | Chloroquine<br>phosphate | 7112877    | November<br>2009  | 150           | 2008-2009              |
| Probiomed<br>S.A de C.V      | 2030 | Chloroquine<br>phosphate | 2030060709 | July 2009         | 150           | 2008-2009              |
| Proteín S.A<br>de C.V        | 2030 | Chloroquine<br>phosphate | 7K2265     | November<br>2012  | 150           | 2009-2010              |
| WEIFA AS,<br>OSLO<br>NORUEGA |      | Primaquine<br>phosphate  | 0731629    | September<br>2010 | 15            | 2009                   |
| Proteín S.A<br>de C.V        | 2032 | Primaquine<br>phosphate  | 6A0239     | September<br>2009 | 15            | 2008                   |
| Proteín S.A<br>de C.V        | 2032 | Primaquine<br>phosphate  | 8B0555     | May 2011          | 15            | 2010                   |
| Proteín S.A<br>de C.V        | 2031 | Primaquine<br>phosphate  | 7H1633     | August<br>2010    | 5             | 2009-2010              |
| Proteín S.A<br>de C.V        | 2031 | Fosfato de<br>primaquina | 6C0547     | March 2009        | 5             | 2008                   |

The batches used were provided by the local malaria control program during the study.  
The use of each lot was discontinued at the expiration date
