# Supplementary material for: Effectiveness of combined chloroquine and primaquine treatment in 14 days versus intermittent single dose regimen, in an open, non-randomized, clinical trial, to eliminate Plasmodium vivax in southern Mexico
Source: PubMed Central journal article supplement (PMC4628368; doi:10.1186/s12936-015-0938-2), 2015-10-30
Supplement: 12936_2015_938_MOESM3_ESM.pdf [file 12936_2015_938_MOESM3_ESM.pdf]

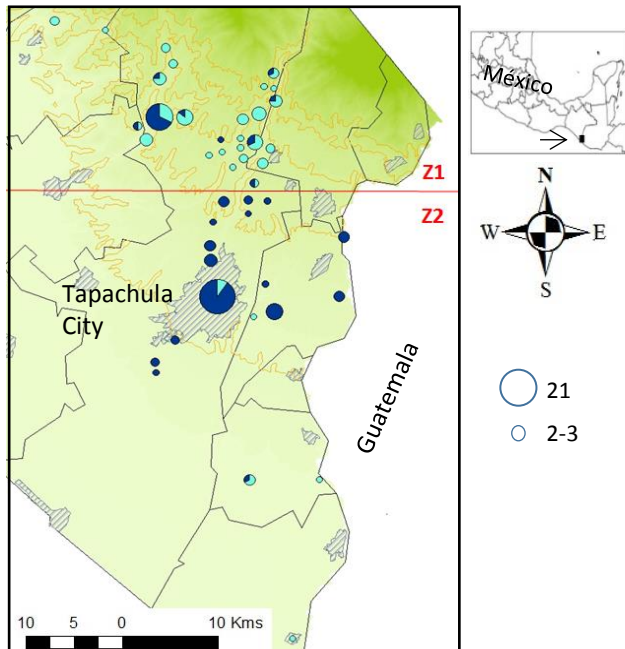

### **Additional file 3 Study site and geographic distribution of T14 versus ISD patients in Southern Mexico, 2008-2010**

Patients recruited to T14 (in dark blue) or ISD (in light blue). An arbitrary division (red line) separates areas according to the proportion of T14 vs ISD patients; a total of 59 ISD and 22 T14 patients came from the foothills (Z1; n=81), and 8 ISD and 64 T14 patients came from Tapachula city and its surrounding areas (Z2; n=72). Similar numbers of patients were recruited from both zones.
