# Supplementary material for: Effectiveness of combined chloroquine and primaquine treatment in 14 days versus intermittent single dose regimen, in an open, non-randomized, clinical trial, to eliminate Plasmodium vivax in southern Mexico
Source: PubMed Central journal article supplement (PMC4628368; doi:10.1186/s12936-015-0938-2), 2015-10-30
Supplement: 12936_2015_938_MOESM4_ESM.pdf [file 12936_2015_938_MOESM4_ESM.pdf]

**Additional file 4 *Plasmodium vivax* genotypes from two groups of patients treated with combined chloroquine and primaquine by the intermittent single dose (ISD) and 14-day (T14) regimens**

| RFLP genotype:    | Treatment regimen (CQ-PQ): |        |
|-------------------|----------------------------|--------|
|                   | ISD                        | 14-day |
| <i>cspr-msp3α</i> |                            |        |
| vk247-A           | 15                         | 18     |
| vk247-B           | 4                          | 4      |
| vk247-C           | 0                          | 3      |
| Vk210-A           | 0                          | 1      |
| vk210-B           | 12                         | 23     |
| vk210-C           | 21                         | 23     |
| vk210-g           | 1                          | 2      |
| vk210-K           | 1                          | 6      |
| vk210-F           | 1                          | 0      |
| vk210-E           | 2                          | 1      |
| vk210-D           | 1                          | 2      |
| Mixed genotypes:  | 7*                         | 3**    |
| ND                | 2                          | 0      |
| Total             | 67                         | 86     |

RFPL, restriction fragment length polymorphism; CQ, chloroquine; PQ, primaquine; \* mixed genotype infections: five with *cspr* (vk210-247) and *msp3α* (A, n=3; B, n=1; C, n=1); two with vk247 and *msp3α* (AB and AC); ND, not determined (one sample did not amplify *msp3α* /and the other sample was not available for PCR analysis); \*\* All were mixed genotype infections, with *cspr* and *msp3α* –A; no differences in the proportions of genotypes between treatment groups were detected, with Fisher’s exact test ( $\alpha=0.05$ ),  $p=0.248$
