# Supplementary material for: Effectiveness of combined chloroquine and primaquine treatment in 14 days versus intermittent single dose regimen, in an open, non-randomized, clinical trial, to eliminate Plasmodium vivax in southern Mexico
Source: PubMed Central journal article supplement (PMC4628368; doi:10.1186/s12936-015-0938-2), 2015-10-30
Supplement: 12936_2015_938_MOESM5_ESM.pdf [file 12936_2015_938_MOESM5_ESM.pdf]

**Additional file 5 Comparison of the *Plasmodium vivax* recurrent blood infection in T14 and ISD patients by geographic location**

| Zones:                                  | Treatment:  |                           |             |                           |
|-----------------------------------------|-------------|---------------------------|-------------|---------------------------|
|                                         | T14         |                           | ISD         |                           |
|                                         | Patients, n | W/recurrent infection (%) | Patients, n | W/recurrent infection (%) |
| Z1, foothills                           | 9           | 0 (0)                     | 43          | 16 (37.2)                 |
| Z2, Tapachula city and its surroundings | 28          | 4 (14.2)                  | 6           | 2 (33.3)                  |
|                                         | 37          | <i>p=0.310</i>            | 49          | <i>p=0.616</i>            |

n, number of patients under follow up; Fisher exact test at 95% CI (see also additional file 3).
