# Supplementary material for: Effectiveness of combined chloroquine and primaquine treatment in 14 days versus intermittent single dose regimen, in an open, non-randomized, clinical trial, to eliminate Plasmodium vivax in southern Mexico
Source: PubMed Central journal article supplement (PMC4628368; doi:10.1186/s12936-015-0938-2), 2015-10-30
Supplement: 12936_2015_938_MOESM6_ESM.pdf [file 12936_2015_938_MOESM6_ESM.pdf]

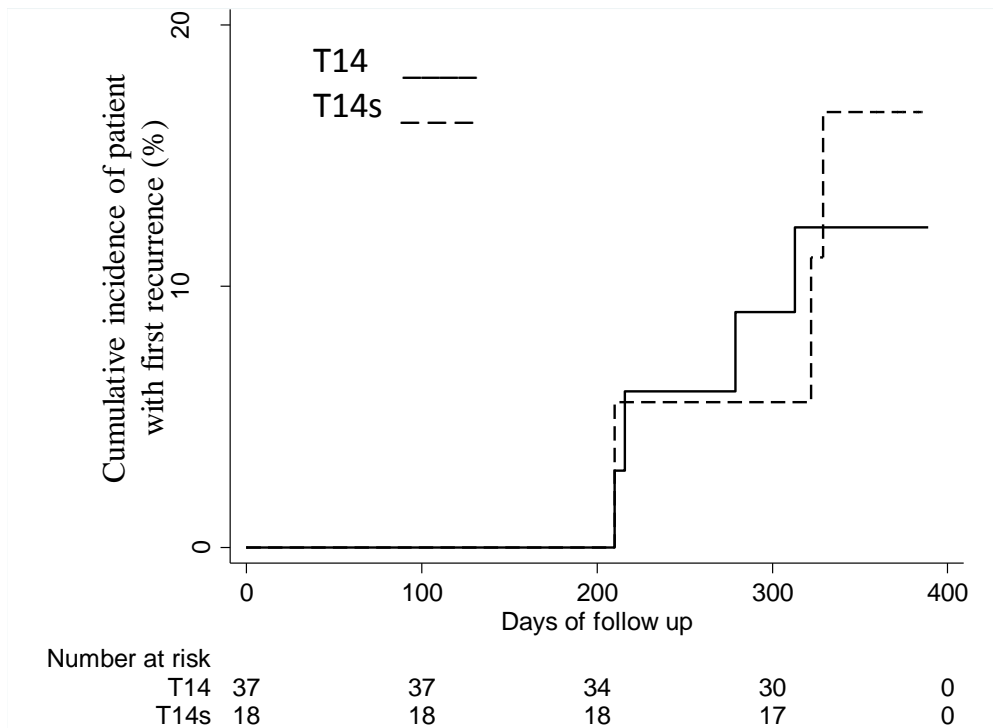

**Additional file 6 Comparison of the cumulative incidence of *Plasmodium vivax* recurrences in patients receiving T14 (CQ-PQ); supervised (T14) and semi-supervised (T14s), and followed up for ~12 - months**
