# Supplementary material for: Effectiveness of combined chloroquine and primaquine treatment in 14 days versus intermittent single dose regimen, in an open, non-randomized, clinical trial, to eliminate Plasmodium vivax in southern Mexico
Source: PubMed Central journal article supplement (PMC4628368; doi:10.1186/s12936-015-0938-2), 2015-10-30
Supplement: 12936_2015_938_MOESM7_ESM.pdf [file 12936_2015_938_MOESM7_ESM.pdf]

**Additional file 7 Parameters of primary and recurrent *Plasmodium vivax* blood infections for patients of the ISD group**

| Patient | Age/<br>sex | Primary blood infection:       |                                       | Recurrent infection by microscopy: |                       |                                | Serology                              |                                                   |
|---------|-------------|--------------------------------|---------------------------------------|------------------------------------|-----------------------|--------------------------------|---------------------------------------|---------------------------------------------------|
|         |             | (p/μl) asexual<br>parasitaemia | RFLP-genotype:<br><i>cspr-msp3α/β</i> | <sup>a</sup> Day                   | clinical<br>symptoms: | (p/μl) asexual<br>parasitaemia | RFLP-genotype:<br><i>cspr-msp3α/β</i> | (ELISA OD value/<br>405NM; cut off<br>value 0.25) |
| P6      | 3/F         | 2,364                          | vk247-A                               | <sup>b</sup> D241                  | Yes                   | 875                            | vk247-A                               | 0.16 <sub>D211</sub> → 2.57 <sub>D241</sub>       |
| P7      | 17/F        | 10,766                         | vk210-B/III                           | <sup>b</sup> D236                  | Yes                   | 14,218                         | vk210-B/III                           | 0.04 <sub>D218</sub> → 1.49 <sub>D236</sub>       |
| P15     | 62/F        | 675                            | vk210-B/IV                            | <sup>b</sup> D312                  | Yes                   | 246                            | vk210-B/IV                            | 0.29 <sub>D301</sub> → >3.0 <sub>D312</sub>       |
| P17     | 36/F        | 480                            | vk210/247-B/III                       | <sup>b</sup> D108                  | Yes                   | 8,485                          | vk247-A/I                             | 0.18 <sub>D89</sub> → 2.1 <sub>D209</sub>         |
| P35     | 20/F        | 2,241                          | vk210-C/V                             | <sup>b</sup> D336                  | Yes                   | 846                            | vk210-C/V                             | 0.18 <sub>D308</sub> → 1.88 <sub>D336</sub>       |
| P37     | 9/M         | 17,598                         | vk210-C/V                             | <sup>b</sup> D287                  | Yes                   | 866                            | vk210-C/V                             | 0.16 <sub>D287</sub> → 1.67 <sub>D308</sub>       |
| P39*    | 2/M         | 4,628                          | vk210/247-B/IV                        | <sup>c</sup> D209                  | Yes                   | Mc-PCR-                        |                                       | 0.17 <sub>D134</sub> → 1.75 <sub>D209</sub>       |
|         |             |                                |                                       | <sup>c</sup> D229                  | No                    | Mc-PCR-                        |                                       | → 1.07 <sub>D229</sub>                            |
|         |             |                                |                                       | D259                               | No                    | Mc-PCR-                        |                                       | → 0.93 <sub>D259</sub>                            |
|         |             |                                |                                       | <sup>b</sup> D287                  | Yes                   | 5,068                          | vk247-B/IV                            | → 1.82 <sub>D287</sub>                            |
| P44     | 60/M        | 2,951                          | vk210-C/VI                            | <sup>b</sup> D282                  | Yes                   | 844                            | vk210-C/VI                            | 0.18 <sub>D244</sub> → 0.53 <sub>D282</sub>       |
| P45     | 63/M        | 496                            | vk247-A                               | <sup>c</sup> D248                  | No                    | Mc-PCR+                        | -                                     | 0.3 <sub>D213</sub> → 0.547 <sub>D248</sub>       |
|         |             |                                |                                       | D271                               | No                    | Mc-PCR-                        |                                       | → 1.34 <sub>D271</sub>                            |
|         |             |                                |                                       | <sup>b</sup> D297 <sup>1</sup>     | Yes                   | 205                            | vk247-A                               | → 2.29 <sub>D297</sub>                            |

|      |      |              |                |                          |     |         |               |                                              |
|------|------|--------------|----------------|--------------------------|-----|---------|---------------|----------------------------------------------|
| P55  | 32/F | <b>3,171</b> | vk210-g        | <sup>c</sup> <b>D31</b>  | No  | 56      | vk210-g       | -                                            |
|      |      |              |                | <sup>b</sup> D152        | Yes | 182     | vk210/247-g/A | 0.36 <sub>D122</sub> → 1.32 <sub>D152</sub>  |
| P56  | 42/F | <b>7,960</b> | vk210-C/V      | <sup>b</sup> <b>D178</b> | Yes | 1,570   | vk210/247-A/I | 0.41 <sub>D147</sub> → 1.12 <sub>D178</sub>  |
| P62  | 26/M | 4,319        | vk210/247-C/II | <sup>b</sup> <b>D216</b> | Yes | 2,594   | vk210-C/II    | 0.15 <sub>D183</sub> → 2.48 <sub>D216</sub>  |
| P63  | 49/M | 640          | ND             | <sup>c</sup> <b>D74</b>  | Yes | Mc-PCR+ | vk210-B/III   | 0.74 <sub>D57</sub> → 1.83 <sub>D74</sub>    |
|      |      |              |                | <sup>b</sup> D183        | Yes | 6,238   | vk210-B/III   | 0.554 <sub>D161</sub> → 2.09 <sub>D183</sub> |
| P71* | 6/F  | 9,294        | vk210-C/V      | <sup>c</sup> <b>D32</b>  | No  | 343     | vk210-C/V     | increased at D90 and after                   |
|      |      |              |                | <sup>c</sup> <b>D66</b>  | No  | 347     | vk210-C/V     |                                              |
| P72  | 12/M | 8,059        | vk210-B/III    | D98 <sup>2</sup>         | Yes | 3,505   | vk210-B/III   | 0.963 <sub>D92</sub> → 2.03 <sub>D98</sub>   |
| P80* | 1/M  | 8,413        | vk247-A        | <sup>c</sup> <b>D210</b> | No  | Mc-PCR- | -             | 0.25 <sub>D189</sub> → 1.71 <sub>D210</sub>  |
|      |      |              |                | <sup>c</sup> <b>D252</b> | No  | 4,603   | vk247-A       | → 0.84 <sub>D252</sub>                       |
|      |      |              |                | <sup>b</sup> D292        | No  | 529     | ND            | → 1.19 <sub>D292</sub>                       |
| P81* | 6/F  | 5,106        | vk210-C/V      | <sup>b</sup> D95         | Yes | 1,378   | vk210-C/V     | 0.18 <sub>D91</sub> → 0.59 <sub>D95</sub>    |
| P136 | 9/M  | 5,744        | vk210-C/V      | <sup>b</sup> D352*       | Yes | 10,029  | vk210-C/V     | 0.12 <sub>D338</sub> → 1.31 <sub>D352</sub>  |

M, male; F, female; RFLP, restriction fragment length polymorphism; *cspr*, circumsporozoite repeat; *msp3α*, merozoite surface protein 3α and 3β; <sup>a</sup> day of visit, and in bold, the day that ISD was scheduled (b, after diagnosed with *P. vivax*, T14 was administered; c, continued the ISD treatment); \*difficult to register other symptoms; ND, not determined; Mc, microscopy; three patients were detected with an antibody increase only (P22, 0.186<sub>D315</sub> → 0.57<sub>D341</sub>, P87, 0.55<sub>D121</sub> → 1.73<sub>D149</sub>, P115, 0.12<sub>D115</sub> → 0.90<sub>D158</sub>), in whom a parasite was not demonstrated by microscopy or PCR. P44, after T14 treatment had a second recurrent episode on D348 that was positive by microscopy; P59, a recurrent episode by microscopy was detected on D419, recorded by the malaria control programme
